# Supplementary material for: Peripheral engineering of platinum(ii) dicarbene pincer complexes for efficient blue hyperphosphorescent organic light-emitting diodes
Source: Royal Society of Chemistry journal article supplement (doi:10.1039/d3qm00273j), 2023-01-01
Supplement: d3qm00273j1.pdf [file d3qm00273j1.pdf]

## Electronic Supplementary Information

### **Peripheral engineering of platinum(II) dicarbene pincer complexes for efficient blue hyperphosphorescent organic light-emitting diodes**

Ze-Lin Zhu,<sup>a†\*</sup> Yan Jie,<sup>b†</sup> Li-Wen Fu,<sup>c</sup> Chen Cao,<sup>a</sup> Ji-Hua Tan,<sup>a</sup> Sheng-Fu Wang,<sup>c</sup> Yun Chi<sup>ab\*</sup> and Chun-Sing Lee<sup>a\*</sup>

<sup>a</sup> Center of Super-Diamond and Advanced Films (COSDAF) and Department of Chemistry, City University of Hong Kong, Hong Kong SAR, China, E-mail: zelinzhu-c@my.cityu.edu.hk; [apcslee@cityu.edu.hk](mailto:apcslee@cityu.edu.hk).

<sup>b</sup> Department of Materials Science and Engineering, City University of Hong Kong, Hong Kong SAR, China, E-mail: yunchi@cityu.edu.hk

<sup>c</sup> Department of Chemistry and Frontier Research Center on Fundamental and Applied Sciences of Matters, Tsing Hua University, Hsinchu 30013, Taiwan, China.

† Equally contributed.

### General information:

$^1\text{H}$  and  $^{19}\text{F}$  NMR spectra were measured with Bruker 400MHz AVANCE III instrument or Bruker 600MHz ASCEND AVANCE III HD instrument. Elemental analysis was carried out on a Heraeus CHN-O Rapid Elementary Analyzer. Mass spectra were recorded on HPLC-High Resolution Mass Spectrometer (Sciex X500R Q-TOF). Acetonitrile was used as solvent and a solvent molecule coordinated signal was detected for all measurements (that is target  $m/z$  plus 41.0265). Single crystal X-ray diffraction study was measured with a Single Crystal Analyzer (Oxford GEMINI S Ultra) using (Mo- $K\alpha$ ) radiation ( $\lambda = 0.71073 \text{ \AA}$ ). Thermogravimetric (TGA) measurements were performed on a Simultaneous Thermal Analyzer (PerkinElmer STA6000) under a nitrogen atmosphere (heating rate:  $10 \text{ }^\circ\text{C min}^{-1}$ ). UV-Vis spectra were recorded on a HITACHI U-3900 spectrophotometer. The steady-state emission spectra and lifetime studies were measured with an Edinburgh FL 980 photon-counting system. To determine the photoluminescence quantum yield ( $\Phi$ ) in solution, samples were degassed using at least three freeze-pump-thaw cycles. Spectral grade solvents (Merck) were used as received. Cyclic voltammetry was conducted on a CHI621A Electrochemical Analyzer equipped with a three-electrode system (glassy carbon: working electrode, platinum wire: auxiliary electrode, Ag/AgCl: reference electrode).  $\text{N}_2$  saturated acetonitrile with 0.1 M  $\text{NBu}_4\text{PF}_6$  supporting electrolyte was used as solvent and potentials were referenced externally to the ferrocenium/ferrocene ( $\text{Fc}^+/\text{Fc}$ ) couple. All calculations were performed with the Gaussian 16 program package. The electron excitation analysis was finished by using the Multiwfn 3.7.<sup>1</sup>

### Device fabrication and measurement:

Before device fabrication, pre-cleaned ITO-coated glass substrates with a sheet resistance of  $15 \text{ } \Omega \text{ square}^{-1}$  were subjected to UV-ozone treatment for 20 min. All the materials are purchased from Lumtec (Taiwan) and organic films were deposited at a rate of  $0.5\text{--}1.0 \text{ \AA s}^{-1}$  by thermal evaporation in a deposition chamber with a base vacuum of  $1 \times 10^{-6}$  Torr. Current density–voltage ( $J$ - $V$ ) characteristics were recorded on a Keithley 237 power source (Tektronix). Luminance and electroluminescence spectra were measured by a PMA-12 photonic multichannel analyzer (Hamamatsu). Except the Pt(II) chlorides, all materials used to fabricate device were purchased from PURI Materials and Lumtec Corp. All measurements were performed in ambient without encapsulation.

### Förster energy transfer radius calculation:

The FET radii ( $R_F$ ) was calculated by below equation.<sup>2,3</sup>

$$J = \int \varepsilon_A(\lambda) F_D(\lambda) \lambda^4 d\lambda \text{-----}(1)$$

$$R_0^6 = \Phi_D \cdot \kappa^2 \left( \frac{9000 \cdot \ln 10}{128 \cdot \pi^5 \cdot N_A \cdot n^4} \right) \cdot \int_0^\infty \varepsilon_A(\lambda) F_D(\lambda) \lambda^4 d\lambda \quad \text{-----(2)}$$

The specific FET radii ( $R_{0S}$ ) were calculated by the above equation, in which  $\Phi_D$  is the photoluminescence quantum efficiency of donor;  $\kappa^2$  is the configurational factor between the energy donor and energy acceptor (assumed to be 2/3 with regard of random distribution);  $N_A$  is the Avogadro's constant;  $n$  is the refractive index of the medium and  $F_D(\lambda)$  is the emission spectra of donor with normalized area;  $\varepsilon_A(\lambda)$  is the molar absorption coefficient ( $\text{mol m}^{-4}$ ).

**Table S1** Calculated transition energy ( $\lambda$ ), main orbital contributions to the lowest singlet and triplet excited states and transition character assignment of Pt(II) complexes.

| complexes             | state                          | $\lambda$ (nm) | Orbital contribution (> 10%) | Assignment                     |
|-----------------------|--------------------------------|----------------|------------------------------|--------------------------------|
| MeCF3Pt               | S <sub>0</sub> -S <sub>1</sub> | 352.23         | HOMO-1 → LUMO (98.3%)        | MLCT/ILCT/XLCT                 |
|                       | S <sub>0</sub> -T <sub>1</sub> | 427.38         | HOMO → LUMO (81.1%)          | MLCT (12.9%)/ILCT/XLCT (29.2%) |
| IPrCF3Pt              | S <sub>0</sub> -S <sub>1</sub> | 350.21         | HOMO-1 → LUMO (98.2%)        | MLCT/ILCT/XLCT                 |
|                       | S <sub>0</sub> -T <sub>1</sub> | 426.03         | HOMO → LUMO (80.6%)          | MLCT (11.5%)/ILCT/XLCT (26.2%) |
| IPr <sup>t</sup> BuPt | S <sub>0</sub> -S <sub>1</sub> | 349.91         | HOMO → LUMO (95.5%)          | MLCT/ILCT/XLCT                 |
|                       | S <sub>0</sub> -T <sub>1</sub> | 427.05         | HOMO → LUMO (80.9%)          | MLCT (11.8%)/ILCT/XLCT (20.5%) |

**Table S2** Selected bond angles and bond lengths.

| compound | Pt-C <sub>Ar</sub> [Å] | Pt-C <sub>NHC</sub> [Å] | Pt-Cl [Å] | C <sub>NHC</sub> -Pt-C <sub>NHC</sub> [°] | C <sub>Ar</sub> -Pt-Cl [°] |
|----------|------------------------|-------------------------|-----------|-------------------------------------------|----------------------------|
| MeCF3Pt  | 1.935                  | 2.025/2.024             | 2.412     | 157.29                                    | 179.68                     |
| IPrCF3Pt | 1.948                  | 2.027/2.033             | 2.381     | 158.29                                    | 177.59                     |
| IPrtBuPt | 1.938                  | 2.032/2.040             | 2.399     | 156.77                                    | 178.23                     |

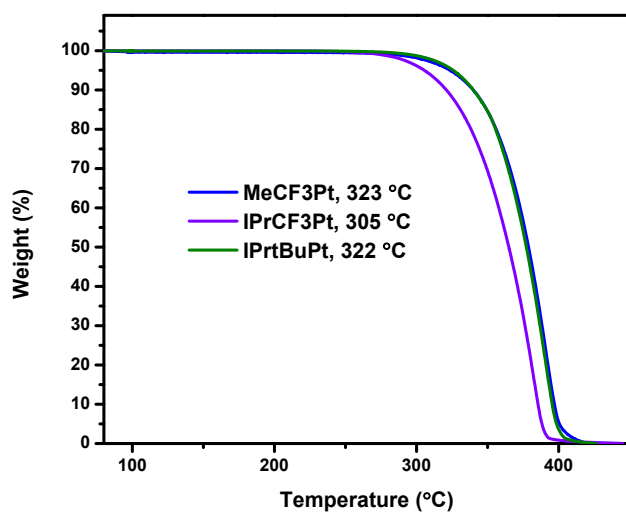

**Fig. S1.** TGA curves of studied compounds measured under N<sub>2</sub> atmosphere.

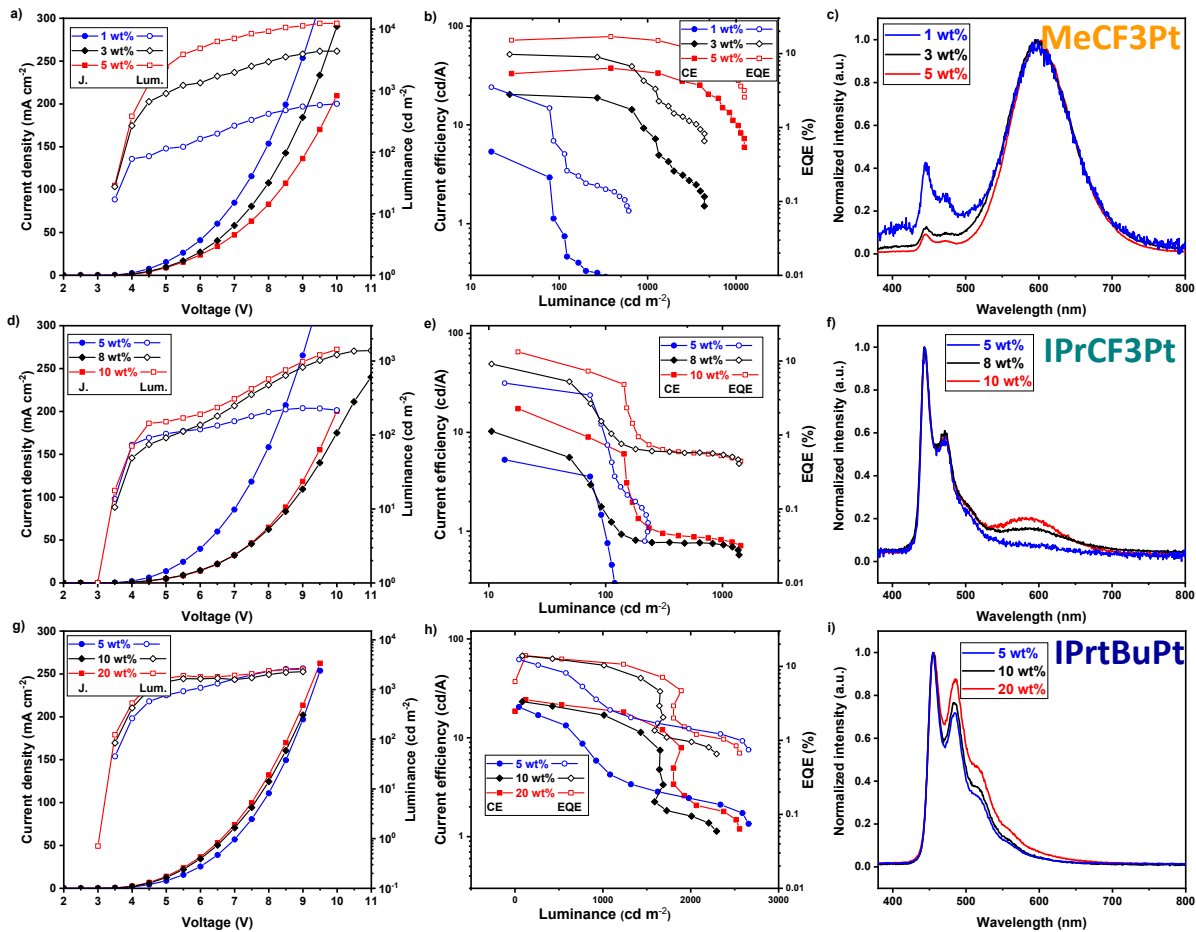

**Fig. S2** a), d) and g) current density–voltage–luminance plots; b), e) and h) current efficiency–luminance–EQE curves and c), f) and i) EL spectrum of MeCF3Pt (top row), IPrCF3Pt (middle row) and IPrtBuPt (bottom row) OLED.

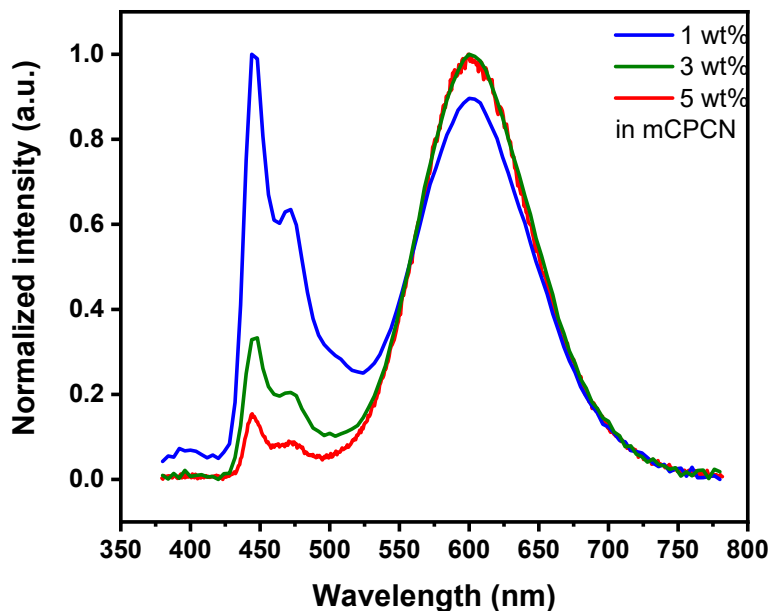

Fig. S3 Concentration dependent PL spectrum of MeCF<sub>3</sub>Pt.

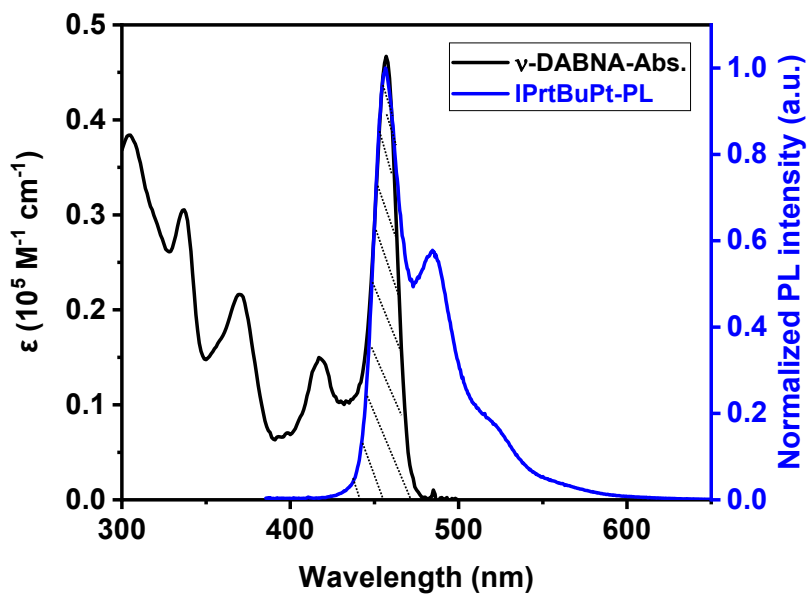

Fig. S4 Overlap area between UV-Vis absorption spectrum of  $\nu$ -DABNA and PL spectrum of IPrtBuPt.

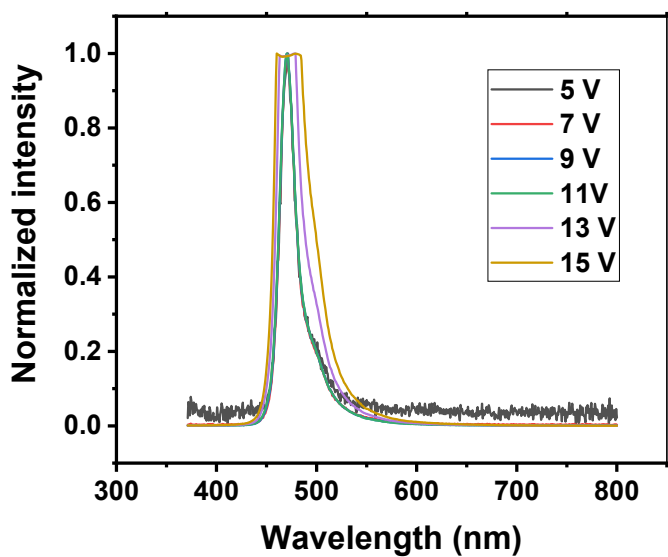

Fig. S5 Voltage-dependent EL spectra of IPrtBuPt-based hyper-OLED.

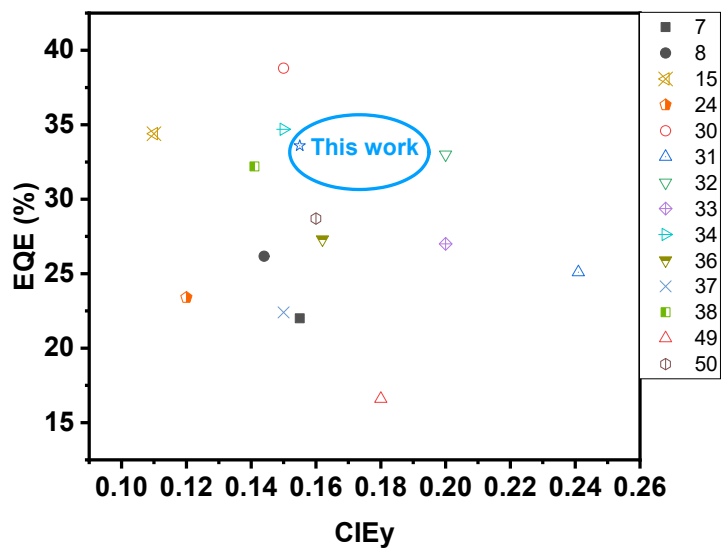

Fig. S6 Comparing performances of representative hyper-OLEDs based on  $\nu$ -DABNA (No. in legend corresponding to ref. No. in the main text).

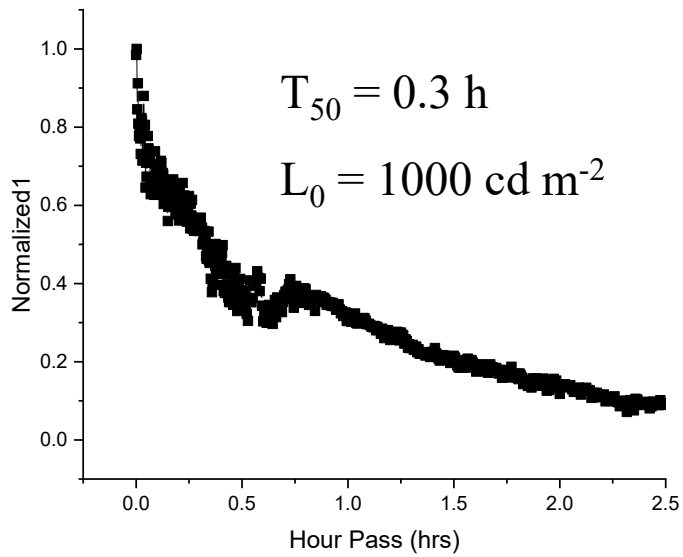

**Fig. S7** Device lifetime of IPrtBuPt-based hyper-OLED.

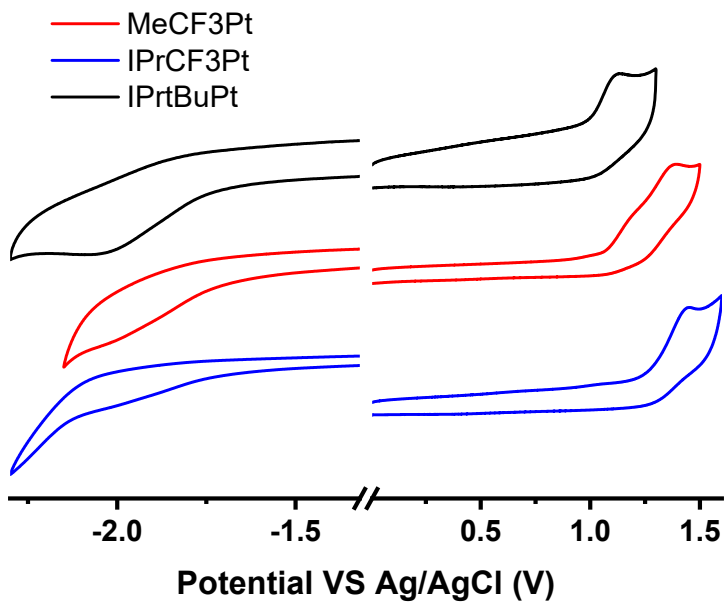

**Fig. S8** Cyclic voltammetry study of MeCF3Pt, IPrCF3Pt and IPrtBuPt.



**Table S3** Crystal data and structure refinement for MeCF3Pt.

|                                             |                                                                                           |
|---------------------------------------------|-------------------------------------------------------------------------------------------|
| Empirical formula                           | C <sub>15.33</sub> H <sub>12.67</sub> Cl <sub>1.67</sub> F <sub>3</sub> N <sub>4</sub> Pt |
| Formula weight                              | 564.13                                                                                    |
| Temperature/K                               | 173(2)                                                                                    |
| Crystal system                              | monoclinic                                                                                |
| Space group                                 | P2 <sub>1</sub> /c                                                                        |
| a/Å                                         | 22.9117(7)                                                                                |
| b/Å                                         | 10.5094(3)                                                                                |
| c/Å                                         | 23.4650(6)                                                                                |
| α/°                                         | 90                                                                                        |
| β/°                                         | 118.9560(10)                                                                              |
| γ/°                                         | 90                                                                                        |
| Volume/Å <sup>3</sup>                       | 4943.8(2)                                                                                 |
| Z                                           | 12                                                                                        |
| ρ <sub>calc</sub> /g/cm <sup>3</sup>        | 2.274                                                                                     |
| μ/mm <sup>-1</sup>                          | 8.823                                                                                     |
| F(000)                                      | 3192.0                                                                                    |
| Crystal size/mm <sup>3</sup>                | 0.51 × 0.25 × 0.03                                                                        |
| Radiation                                   | MoKα (λ = 0.71073)                                                                        |
| 2θ range for data collection/°              | 4.376 to 52.788                                                                           |
| Index ranges                                | -28 ≤ h ≤ 28, -12 ≤ k ≤ 13, -29 ≤ l ≤ 29                                                  |
| Reflections collected                       | 43144                                                                                     |
| Independent reflections                     | 10105 [R <sub>int</sub> = 0.0374, R <sub>sigma</sub> = 0.0335]                            |
| Data/restraints/parameters                  | 10105/70/709                                                                              |
| Goodness-of-fit on F <sup>2</sup>           | 1.021                                                                                     |
| Final R indexes [I >= 2σ (I)]               | R <sub>1</sub> = 0.0249, wR <sub>2</sub> = 0.0579                                         |
| Final R indexes [all data]                  | R <sub>1</sub> = 0.0304, wR <sub>2</sub> = 0.0603                                         |
| Largest diff. peak/hole / e Å <sup>-3</sup> | 0.96/-1.59                                                                                |

**Table S4** Crystal data and structure refinement for IPrCF3Pt.

|                                      |                                                                    |
|--------------------------------------|--------------------------------------------------------------------|
| Empirical formula                    | C <sub>19</sub> H <sub>20</sub> ClF <sub>3</sub> N <sub>4</sub> Pt |
| Formula weight                       | 591.93                                                             |
| Temperature/K                        | 173(2)                                                             |
| Crystal system                       | orthorhombic                                                       |
| Space group                          | Pbca                                                               |
| a/Å                                  | 12.3204(3)                                                         |
| b/Å                                  | 16.7473(3)                                                         |
| c/Å                                  | 39.9010(9)                                                         |
| α/°                                  | 90                                                                 |
| β/°                                  | 90                                                                 |
| γ/°                                  | 90                                                                 |
| Volume/Å <sup>3</sup>                | 8232.9(3)                                                          |
| Z                                    | 16                                                                 |
| ρ <sub>calc</sub> /g/cm <sup>3</sup> | 1.910                                                              |

|                                                |                                                               |
|------------------------------------------------|---------------------------------------------------------------|
| $\mu/\text{mm}^{-1}$                           | 6.985                                                         |
| F(000)                                         | 4544.0                                                        |
| Crystal size/ $\text{mm}^3$                    | $0.47 \times 0.21 \times 0.03$                                |
| Radiation                                      | MoK $\alpha$ ( $\lambda = 0.71073$ )                          |
| 2 $\Theta$ range for data collection/ $^\circ$ | 4.584 to 52.764                                               |
| Index ranges                                   | $-13 \leq h \leq 15, -20 \leq k \leq 20, -49 \leq l \leq 49$  |
| Reflections collected                          | 39834                                                         |
| Independent reflections                        | 8242 [ $R_{\text{int}} = 0.0495, R_{\text{sigma}} = 0.0423$ ] |
| Data/restraints/parameters                     | 8242/777/621                                                  |
| Goodness-of-fit on $F^2$                       | 1.064                                                         |
| Final R indexes [ $I \geq 2\sigma(I)$ ]        | $R_1 = 0.0463, wR_2 = 0.1392$                                 |
| Final R indexes [all data]                     | $R_1 = 0.0648, wR_2 = 0.1516$                                 |
| Largest diff. peak/hole / $e \text{ \AA}^{-3}$ | 2.12/-1.94                                                    |

**Table S5** Crystal data and structure refinement for IPrtBuPt.

|                                                |                                                               |
|------------------------------------------------|---------------------------------------------------------------|
| Empirical formula                              | $\text{C}_{22}\text{H}_{29}\text{ClN}_4\text{Pt}$             |
| Formula weight                                 | 580.03                                                        |
| Temperature/K                                  | 213(2)                                                        |
| Crystal system                                 | monoclinic                                                    |
| Space group                                    | $P2_1/c$                                                      |
| $a/\text{\AA}$                                 | 10.8304(3)                                                    |
| $b/\text{\AA}$                                 | 25.8800(7)                                                    |
| $c/\text{\AA}$                                 | 17.1779(4)                                                    |
| $\alpha/^\circ$                                | 90                                                            |
| $\beta/^\circ$                                 | 103.0080(10)                                                  |
| $\gamma/^\circ$                                | 90                                                            |
| Volume/ $\text{\AA}^3$                         | 4691.3(2)                                                     |
| Z                                              | 8                                                             |
| $\rho_{\text{calc}}/\text{g/cm}^3$             | 1.642                                                         |
| $\mu/\text{mm}^{-1}$                           | 6.110                                                         |
| F(000)                                         | 2272.0                                                        |
| Crystal size/ $\text{mm}^3$                    | $0.25 \times 0.11 \times 0.03$                                |
| Radiation                                      | MoK $\alpha$ ( $\lambda = 0.71073$ )                          |
| 2 $\Theta$ range for data collection/ $^\circ$ | 4.366 to 52.786                                               |
| Index ranges                                   | $-13 \leq h \leq 13, -32 \leq k \leq 32, -19 \leq l \leq 21$  |
| Reflections collected                          | 30971                                                         |
| Independent reflections                        | 9530 [ $R_{\text{int}} = 0.0584, R_{\text{sigma}} = 0.0644$ ] |
| Data/restraints/parameters                     | 9530/294/578                                                  |
| Goodness-of-fit on $F^2$                       | 1.003                                                         |
| Final R indexes [ $I \geq 2\sigma(I)$ ]        | $R_1 = 0.0390, wR_2 = 0.0721$                                 |
| Final R indexes [all data]                     | $R_1 = 0.0689, wR_2 = 0.0843$                                 |
| Largest diff. peak/hole / $e \text{ \AA}^{-3}$ | 0.82/-1.07                                                    |

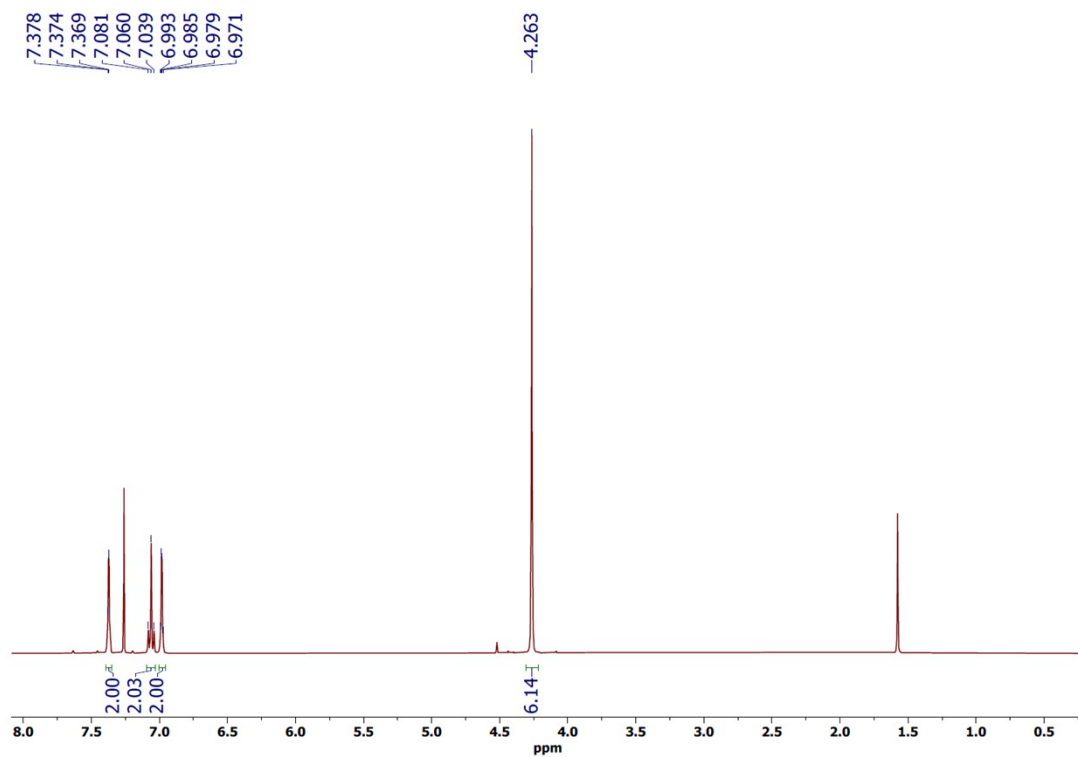

**Fig. S9.**  $^1\text{H}$ -NMR (400 MHz) spectrum of MeCF<sub>3</sub>Pt.

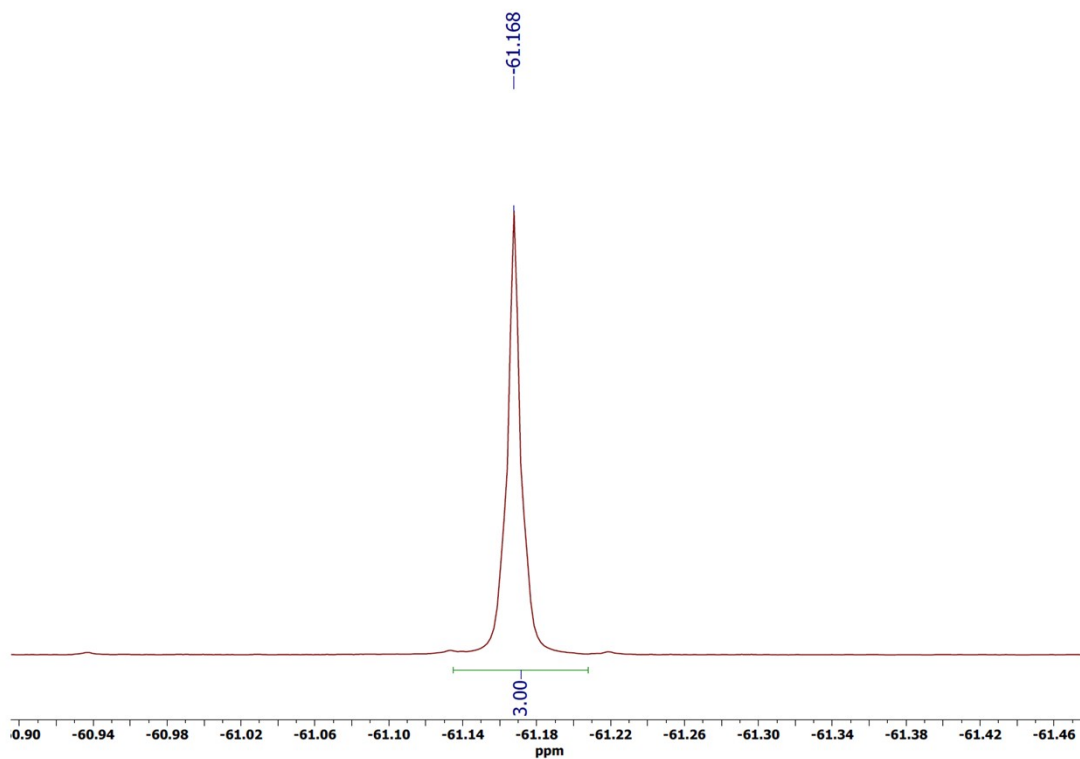

**Fig. S10.**  $^{19}\text{F}$ -NMR (376 MHz) spectrum of MeCF<sub>3</sub>Pt.

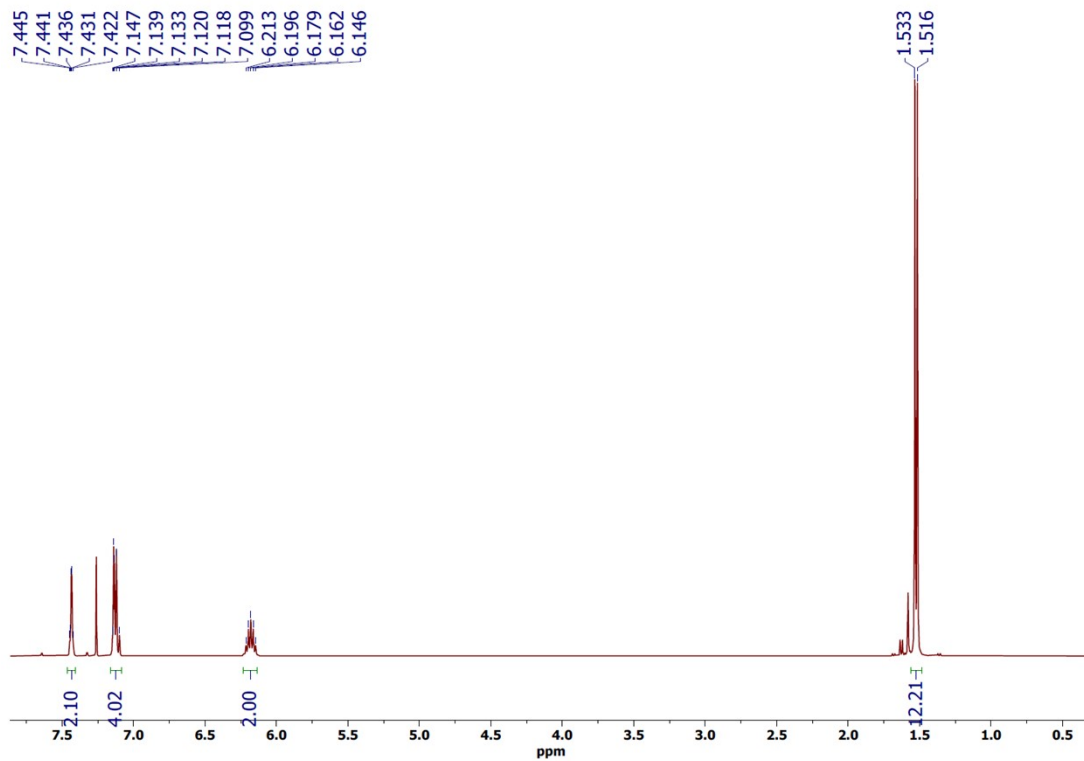

**Fig. S11.**  $^1\text{H}$ -NMR (400 MHz) spectrum of IPrCF<sub>3</sub>Pt.

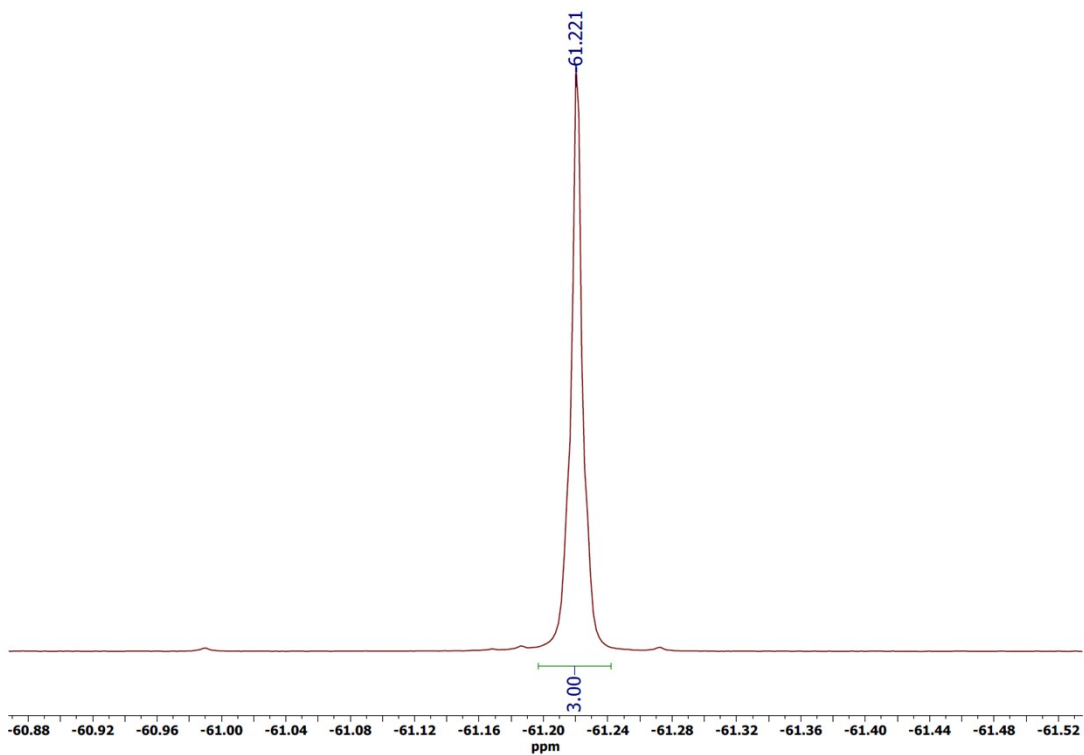

**Fig. S12.**  $^{19}\text{F}$ -NMR (376 MHz) spectrum of IPrCF<sub>3</sub>Pt.

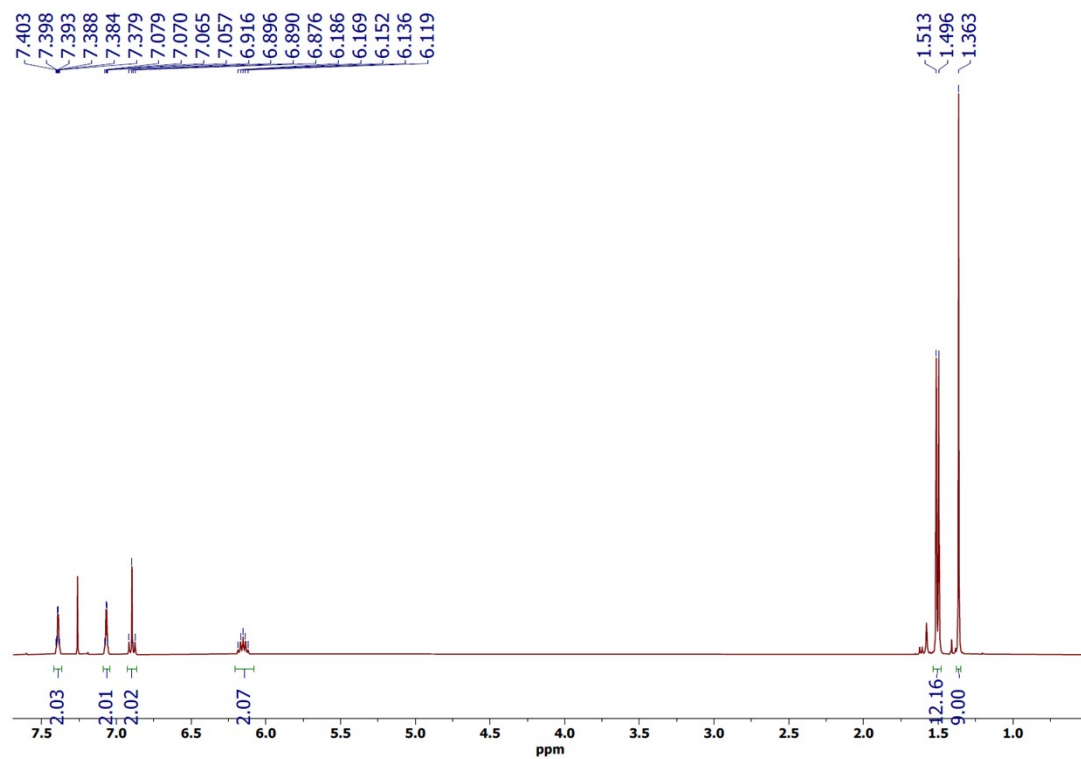

**Fig. S13.** <sup>1</sup>H-NMR (400 MHz) spectrum of IPrtBuPt.

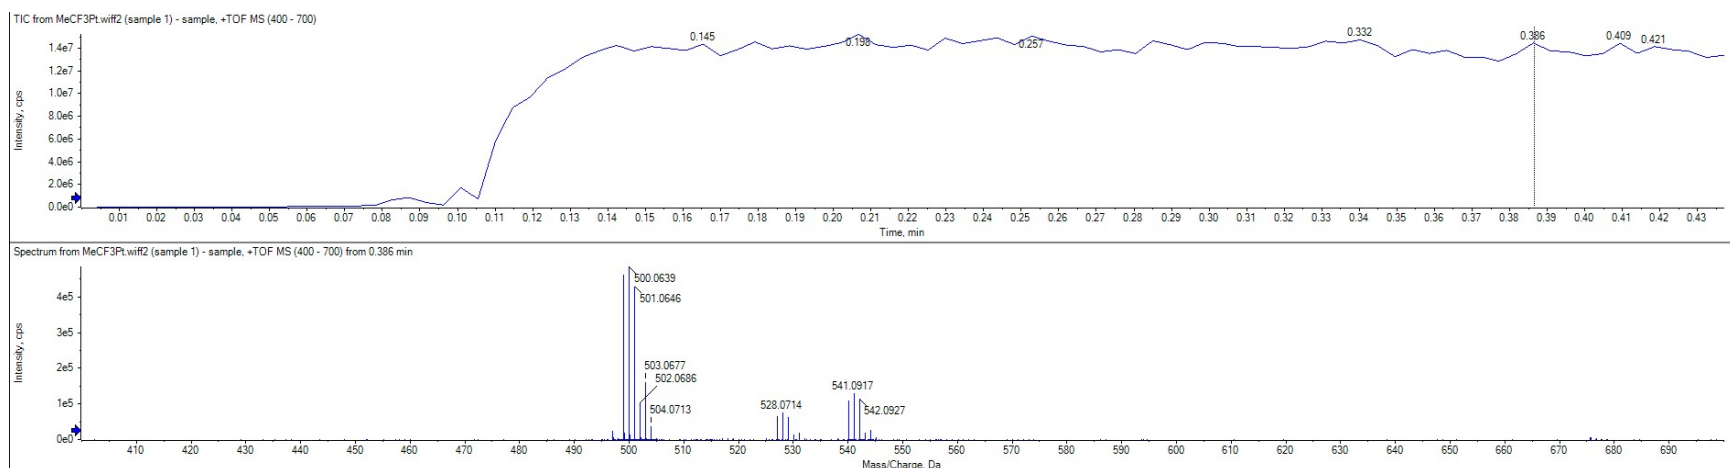

**Fig. S14.** HR-MS spectrum of MeCF3Pt.

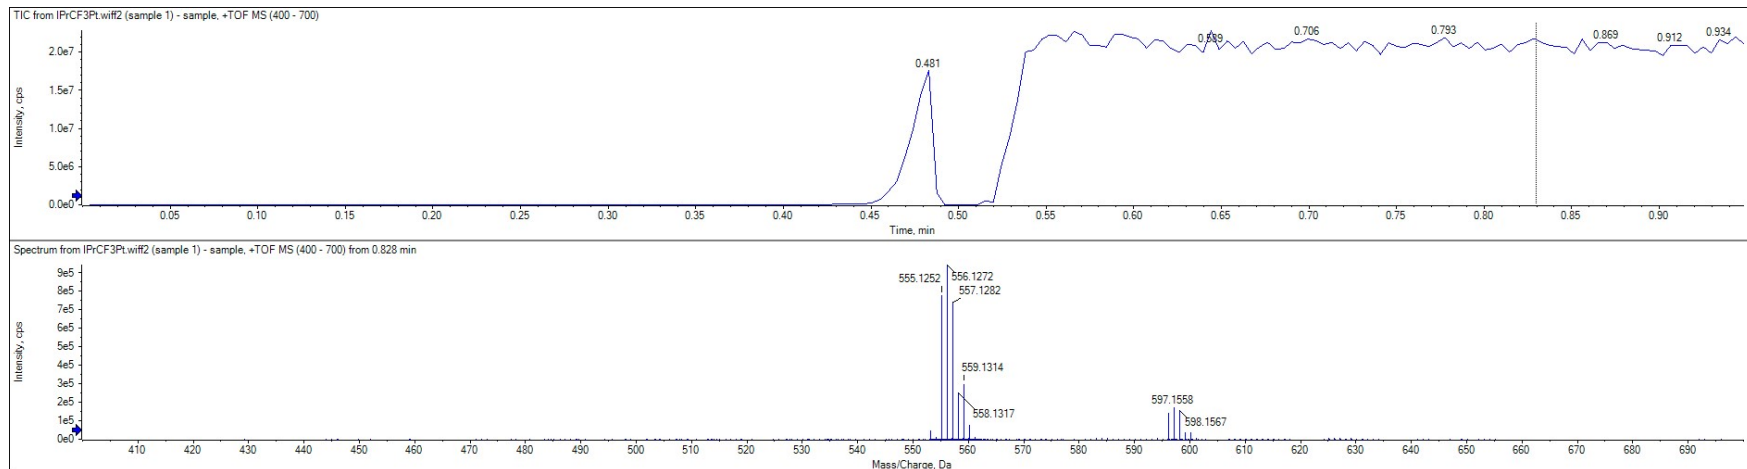

**Fig. S15.** HR-MS spectrum of IPrCF3Pt.

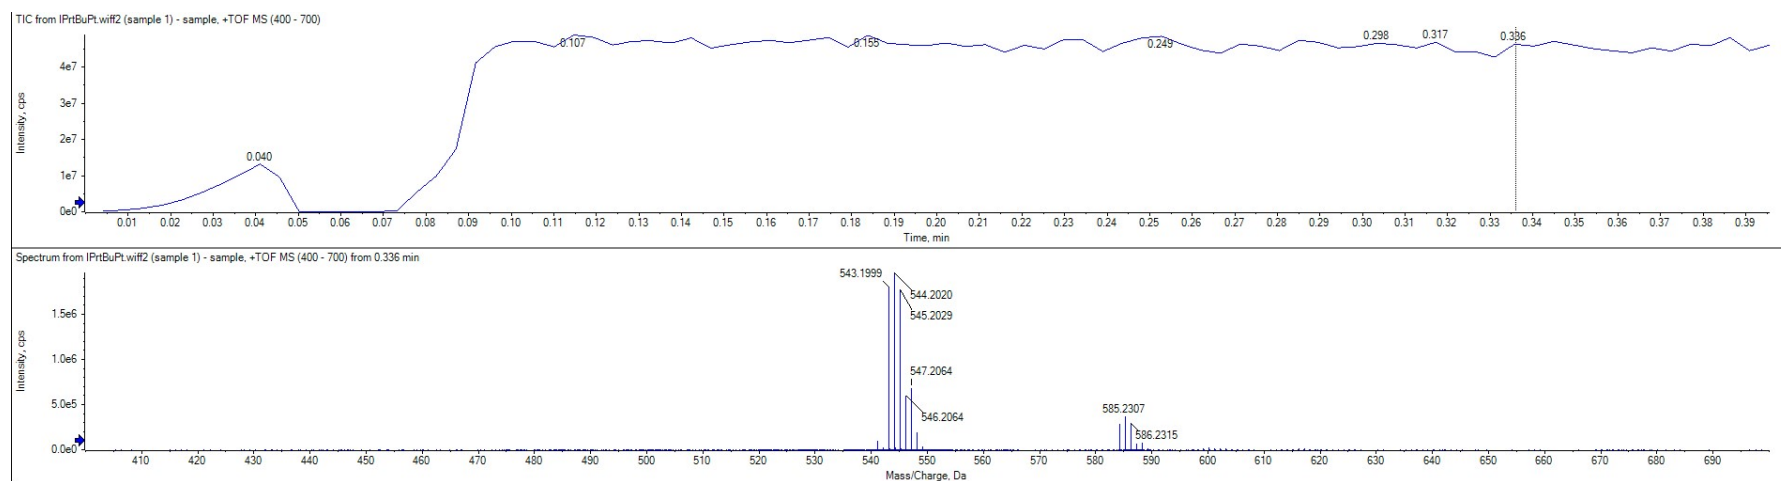

**Fig. S16.** HR-MS spectrum of IPrtBuPt.

## References

- 1 T. Lu and F. Chen, Multiwfn: A multifunctional wavefunction analyzer, *J. Comput. Chem.*, 2012, **33**, 580.
- 2 N. Hildebrandt and I. L. Medintz, FRET-Forster Resonance Energy Transfer: From Theory to Applications, Wiley-VCH Verlag GmbH, 2014.
- 3 C. Zhang, Y. Lu, Z. Liu, Y. Zhang, X. Wang, D. Zhang and L. Duan, A  $\pi$ -D and  $\pi$ -A Exciplex-Forming Host for High-Efficiency and Long-Lifetime Single-Emissive-Layer Fluorescent White Organic Light-Emitting Diodes, *Adv. Mater.*, 2020, **32**, 2004040.
